# Supplementary material
Source: PubMed Central journal article supplement (PMC2533268)
Supplement: NIHMS61221-supplement-si20060606_062.pdf [file NIHMS61221-supplement-si20060606_062.pdf]

# **Creation of a Broad-Range and Highly Stereoselective D-Amino Acid Dehydrogenase for the One-Step Synthesis of D-Amino Acids**

*Kavitha Vedha-Peters, Manjula Gunawardana, J. David Rozzell, and Scott J. Novick\**

BioCatalytics, Inc., 129 North Hill Avenue, Suite 103, Pasadena, CA 91106

## **Supporting Information**

The following table contains the chromatography conditions used to analyze the enantioselectivity of the mutant D-amino acid dehydrogenase (BC621).

| D-Amino acid product              | Column | Retention time (min) | Method                                                 |
|-----------------------------------|--------|----------------------|--------------------------------------------------------|
| D-Alanine (D-2-aminopropionate)   | T      | L: 8.3<br>D: 9.6     | 40% methanol<br>60% water (0.2% TEAA, pH 3.8)          |
| D-2-Aminobutyrate                 | T      | L: 8.8<br>D: 9.9     | 20% acetonitrile<br>80% water (0.2% TEAA, pH 3.8)      |
| D-Norvaline (D-2-aminopentanoate) | R      | L: 7.5<br>D: 11.2    | 20% acetonitrile<br>80% water (0.2% TEAA, pH 3.8)      |
| D-Norleucine (D-2-aminohexanoate) | T      | L: 8.7<br>D: 17.1    | 40% methanol<br>60% water (0.2% TEAA, pH 3.8)          |
| D-2-Aminoheptanoate               | T      | L: 9.7<br>D: 17.3    | 40% methanol<br>60% water (0.2% TEAA, pH 3.8)          |
| D-2-Aminooctanoate                | T      | L: 11.5<br>D: 21.3   | 40% methanol<br>60% water (0.2% TEAA, pH 3.8)          |
| D-Valine                          | T      | L: 9.37<br>D: 10.5   | 20% acetonitrile<br>80% water (0.2% TEAA, pH 3.8)      |
| D-Isoleucine                      | T      | L: 7.8<br>D: 12.5    | 40% methanol<br>60% water (0.2% TEAA, pH 3.8)          |
| D-Leucine                         | T      | L: 11.0<br>D: 13.5   | 20% acetonitrile<br>80% water (0.2% TEAA, pH 3.8)      |
| D-Cyclopentylglycine              | T      | L: 9.3<br>D: 13.2    | 40% methanol<br>60% water (0.2% TEAA, pH 3.8)          |
| D-Cyclohexylalanine               | T      | L: 7.9<br>D: 8.9     | 50% methanol<br>50% water (0.1% each TEA, acetic acid) |
| D-Methionine                      | T      | L: 8.2<br>D: 17.0    | 40% methanol<br>60% water (0.2% TEAA, pH 3.8)          |
| D-Phenylalanine                   | T      | L: 5.6<br>D: 7.3     | 80% methanol<br>20% water (0.2% TEAA, pH 3.8)          |
| D-Tyrosine                        | T      | L: 5.1<br>D: 6.3     | 80% methanol<br>20% water (0.2% TEAA, pH 3.8)          |
| D-4-Fluorophenylalanine           | T      | L: 5.4<br>D: 6.7     | 80% methanol<br>20% water (0.2% TEAA, pH 3.8)          |
| D-4-Chlorophenylalanine           | T      | L: 5.7<br>D: 7.2     | 80% methanol<br>20% water (0.2% TEAA, pH 3.8)          |

Notes:

- T: Chirobiotic T (Astec, Inc.), 250 x 4.6 mm, 5  $\mu$ m particle size
- R: Chirobiotic R (Astec, Inc.), 250 x 4.6 mm, 5  $\mu$ m particle size
- The flow rate was 1 ml/min in all cases and all runs were performed isocratic conditions.

- TEAA was made by adding triethylamine to water at the given concentration and adjusting to the given pH with acetic acid.
- All amino acid, except for the aromatic amino one, were labeled with Fmoc for UV visualization at 265 nm. The aromatic amino acids were observed directly at 254 nm.
